# Supplementary material for: Infrared imaging in breast cancer: automated tissue component recognition and spectral characterization of breast cancer cells as well as the tumor microenvironment
Source: Royal Society of Chemistry journal article supplement (doi:10.1039/c3an01454a), 2013-12-06
Supplement: c3an01454a.pdf [file c3an01454a.pdf]

## **SUPPLEMENTARY INFORMATION**

Infrared imaging in breast cancer: automated tissue component recognition and spectral characterization of breast cancer cells as well as tumor microenvironment  
(Benard et al)

Supplementary Information is divided in two parts :

1/ Supplementary Materials & Methods

2/ Supplementary Figures & Tables

## Supplementary Materials & Methods

*Cell culture and processing:* Six breast cancer cell lines (LY2; SKBR3; T47D; MCF-7; MDA-MB-231; MDA-MB-361) obtained from the American Type Culture Collection (ATCC, Manassas, VA) were cultivated, harvested and prepared in the Breast Cancer Translational Research Laboratory (BCTL). Cells were maintained at 37°C in a humidified atmosphere containing 5% CO<sub>2</sub>. LY2, SKBR3, MCF-7 and MDA-MB-231 were kept in exponential growth in DMEM medium (+ L-glutamine + 4.5 g/l glucose) while T47D and MDA-MB-361 were cultivated in RPMI medium (+ L-glutamine + 25mM Hepes). The culture medium was supplemented by 10% of foetal bovine serum (FBS) and 1 % of penicillin/streptomycin (an antibiotic/antimycotic solution). Medium and penicillin/streptomycin solution were purchased from Lonza Group Ltd, Basel, Switzerland. When 80% of confluence in the culture flask was reached, cells were washed once with phosphate buffered saline (PBS) solution (Lonza Group Ltd, Basel, Switzerland). Thereafter, cells were detached by means of a five-minute treatment with 2 ml of Triple Select (Gibco, Invitrogen, Merelbeke, Belgium). The reaction was stopped by adding medium in the culture flask. The cells were pelleted by a 5-minute centrifugation at 1500 rpm. After removal of the supernatant, cells were fixed using 1 ml of formaldehyde (QPath, Labonord SAS, Templemars, France) and kept at room temperature for 2 or 3 hours. A 30-second vortex treatment was followed by a 10-minute centrifugation at 1000 rpm to remove the supernatant. PBS with 2% of agar was used in order to recover the cell pellet which was next, paraffin-embedded. A 3 µm thick section of the paraffin block was then mounted on a barium fluoride (BaF<sub>2</sub>) window for IR imaging analysis. As well as for tissue samples, the cell pellet section was subsequently deparaffinized, rehydrated and dried.

### Breast spectral database

An overview of the database composition is given in Supplementary Table 1. The built-up database is large enough so that intra- and inter-class variances are adequately represented. A 2 PC clean up process was applied in order to eliminate spectra with highly different behaviour from average. For each tissue component class, a PCA analysis was computed on the 1800-1000  $\text{cm}^{-1}$  region. The average projection on  $\text{PC}_1$  and  $\text{PC}_2$  and the associated standard deviation were calculated. Considering a normal distribution of the data, spectra for which the projection on  $\text{PC}_1$  and  $\text{PC}_2$  components beyond the standard deviation were rejected.

## Supplementary figures & tables

**Figure S1:** Typical example of histopathological features used to build the breast spectral database. Photomicrographs of a 3  $\mu\text{m}$  thick H&E stained section of an invasive grade I ductal adenocarcinoma. (A) Healthy histological structures. (B) Lymphocytic infiltration confirming immune response to the malignant proliferation. The histological types are indicated: healthy (1) and malignant (2) epithelial cells; erythrocytes (3); milk residue or secretion (4); lymphocytes (5) and extracellular matrix components (6).

**Table S1 :** Overview of the database composition

Figure S1

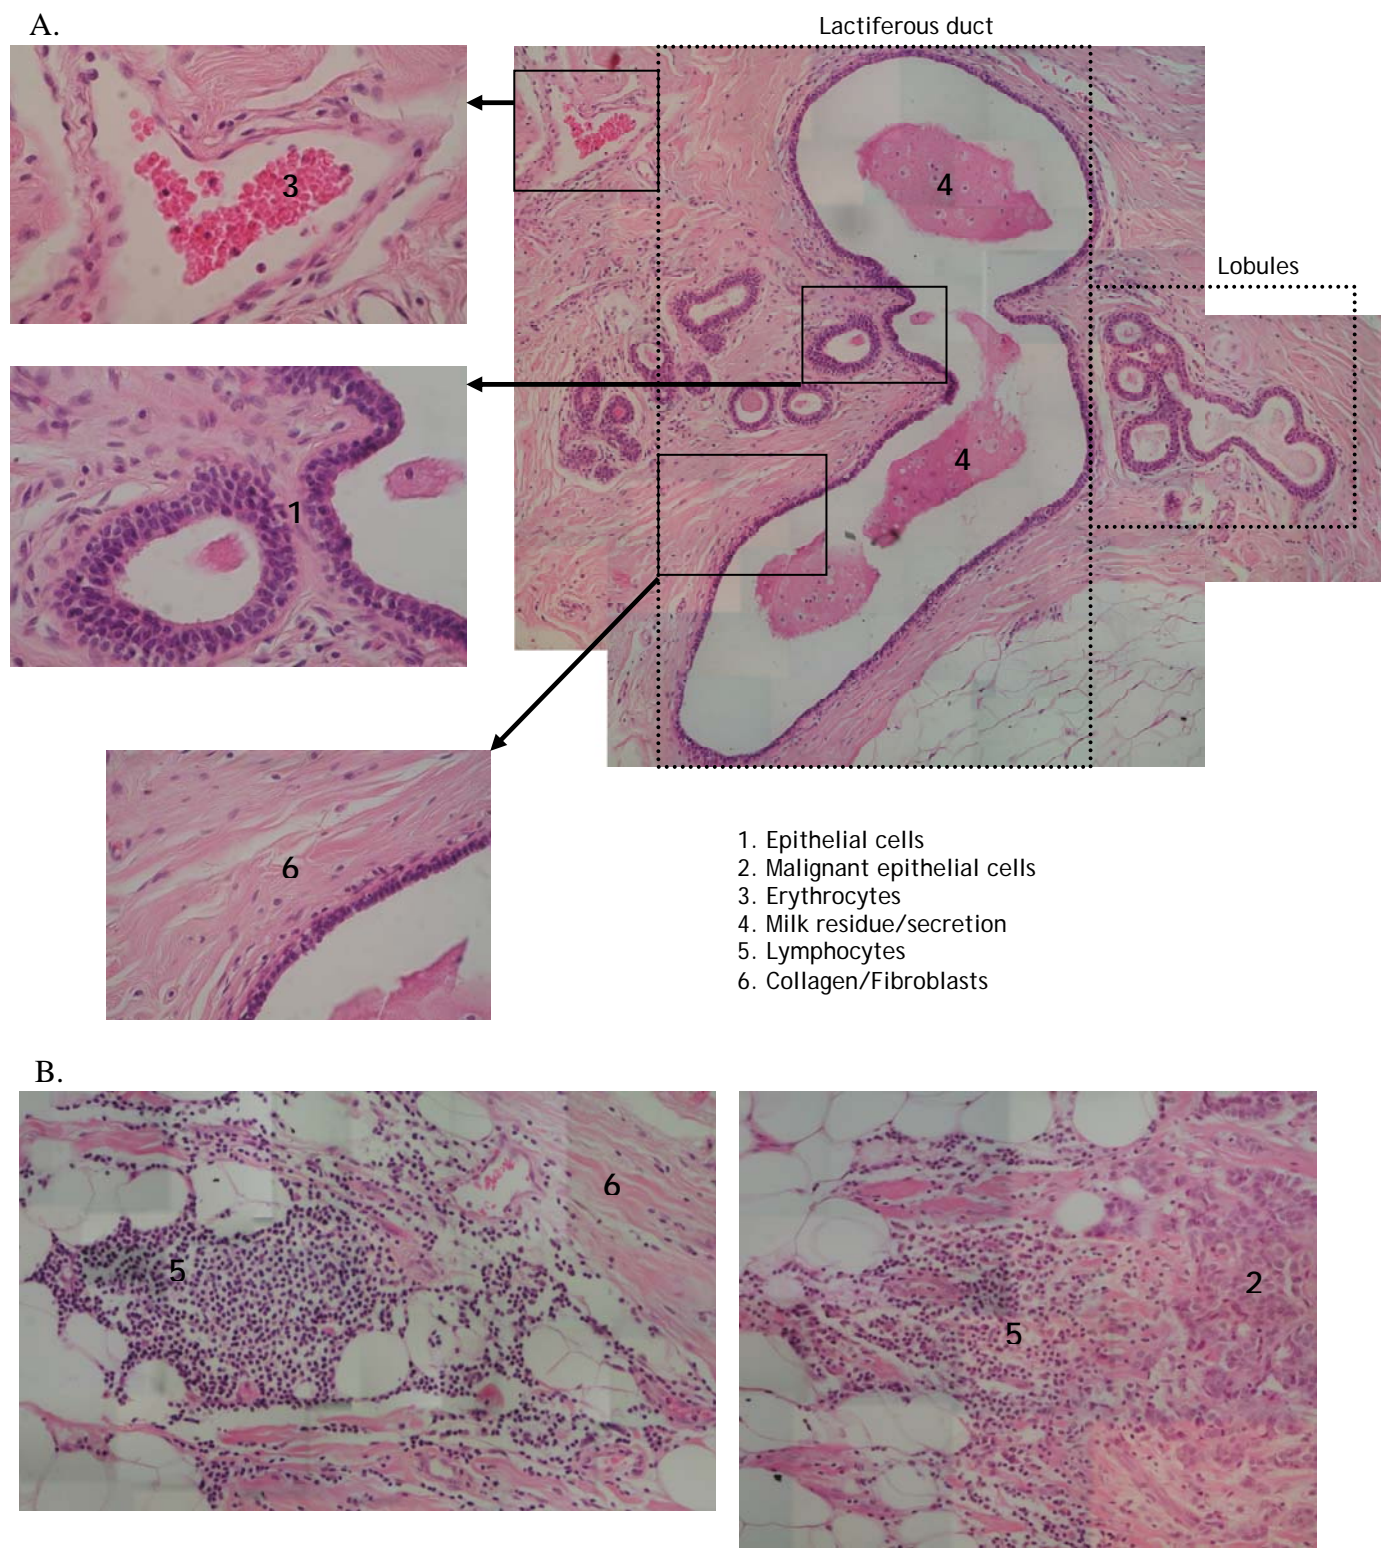

Table S1

| <i>Class name</i>                 | <i># database spectra</i> | <i># spectra after 2 PC clean up</i> |
|-----------------------------------|---------------------------|--------------------------------------|
| <b>Epithelial cells</b>           | 3006                      | 2660                                 |
| <b>Erythrocytes</b>               | 1114                      | 1023                                 |
| <b>Lymphocytes</b>                | 1888                      | 1741                                 |
| <b>Collagen &amp; Fibroblasts</b> | 7267                      | 6498                                 |
| <b>Protein component</b>          | 293                       | 257                                  |
| <b>Complete database</b>          | <b>13568</b>              | <b>12179</b>                         |
